# Supplementary material for: Inverse Association Between Preoperative Cardiac Output and Postoperative Kidney Function in Off-Pump Coronary Artery Bypass Grafting
Source: Research Square preprint supplement (doi:10.21203/rs.3.rs-8225284/v1), 2025-12-17
Supplement: Supplementary file 1 [file 85f38eb6e9c6f039f3f3cd56.docx]

**Supplementary information**

The authors provided this supplementary file for the following manuscript:

**“Inverse Association Between Preoperative Cardiac Output and Postoperative Kidney Function in Off-Pump Coronary Artery Bypass Grafting”**

**Content**

**Supplementary Table 1:** Preoperative baseline characteristics of 1949 patients include all variables 3

**Supplementary Table 2:** Preoperative baseline characteristics with patients grouped by cardiac index <3.0 L/min/m2 vs. ≥3.0 L/min/m2 6

**Supplementary Table 3:** Demographic and preoperative characteristics in propensity score-matching with patients grouped by cardiac index <3.0 L/min/m2 vs. ≥3.0 L/min/m2 9

**Supplementary Table 4:** Demographic and preoperative characteristics in propensity score-matching with patients grouped by cardiac index < 3.5 L/min/m² vs. ≥ 3.5 L/min/m² 11

**Supplementary Table 5:** Demographic and preoperative characteristics in propensity score-matching with patients grouped by cardiac output < 5.0 L/min vs.≥ 5.0 L/min 13

**Supplementary Table 6:** Demographic and preoperative characteristics in propensity score-matching with patients grouped by cardiac output < 6.0 L/min vs.≥ 6.0 L/min 15

**Supplementary Table 7**: Association between preoperative cardiac index or cardiac output and acute kidney injury through crude and propensity score-based analyses 17

**Supplementary Table 8:** Analysis of the mediation by the AUC below the ward baseline in the association between preoperative cardiac index <3.0 L/min/m² and acute kidney injury 18

**Supplementary Table 9:** Analysis of the mediation by the AUC below the ward baseline in the association between preoperative cardiac index <3.5 L/min/m² and acute kidney injury 19

**Supplementary Table 10:** Analysis of the mediation of intraoperative-related variables in the association between preoperative cardiac index <3.0 L/min/m² and acute kidney injury 20

**Supplementary Table 11:** Distribution of 748 cardiac procedures identified in the MIMIC-IV v3.1 database 21

**Supplementary Table 12:** Methods of pre-procedure cardiac output measurement in 748 cardiac cases from the MIMIC-IV v3.1 database 23

**Supplementary Table 13:** Association between preoperative cardiac index and acute kidney injury through crude analysis in the MIMIC-IV v3.1 database 24

**Supplementary Table 14:** Baseline information of patients having cardiac procedures in the MIMIC-IV v3.1 database 25

**Supplementary Table 15:** Demographic and preoperative characteristics with patients grouped by cardiac index <3.0 L/min/m2 vs. ≥3.0 L/min/m2 in the MIMIC-IV v3.1 database 27

**Supplementary Figure 1:** Comparison of a single patient's raw and smoothed intraoperative cardiac index. 28

**Supplementary Table 1:** Preoperative baseline characteristics of 1949 patients include all variables

| **Characteristics*** | **Summary** | **Missingness,**  **n (%)** |
| --- | --- | --- |
| Age (year), mean (SD) | 69 (5) | 0 |
| Male, n (%) | 1364 (70.0) | 0 |
| Height (cm), mean (SD) | 168 (8) | 0 |
| Weight (kg), mean (SD) | 71 (11) | 0 |
| Body mass index (kg/m2), mean (SD) | 25.3 (3.3) | 0 |
| Smoking, n (%)† | 1124 (57.7) | 0 |
| Drinking, n (%)‡ | 498 (25.6) | 0 |
| Myocardial infarction, n (%)§ | 545 (28.0) | 0 |
| Arrhythmia, n (%)¶ | 186 (9.5) | 0 |
| Diabetes, n (%)# | 843 (43.3) | 0 |
| Hypertension, n (%)** | 1422 (73.0) | 0 |
| Carotid artery disease, n (%)†† | 482 (24.7) | 0 |
| Metabolic disease, n (%)‡‡ | 42 (2.2) | 0 |
| Gastrointestinal disease, n (%)‡‡ | 63 (3.2) | 0 |
| Hematological system disease, n (%)‡‡ | 4 (0.2) | 0 |
| Cancer, n (%)‡‡ | 6 (0.3) | 0 |
| Cognitive dysfunction, n (%)‡‡ | 7 (0.4) | 0 |
| Pulmonary disease, n (%)‡‡ | 46 (2.4) | 0 |
| Renal diseases, n (%)‡‡ | 17 (0.9) | 0 |
| Liver disease, n (%)‡‡ | 9 (0.5) | 0 |
| Beta blocker, n(%) | 1664 (85.4) | 0 |
| ACEI, n (%) | 63 (3.2) | 0 |
| Calcium channel blocker, n (%) | 801 (41.1) | 0 |
| Angiotensin receptor blocker, n (%) | 695 (35.7) | 0 |
| Statin, n (%) | 1902 (97.6) | 0 |
| Anticoagulant, n (%) | 1919 (98.5) | 0 |
| Antidiabetic, n (%)§§ | 899 (46.1) | 0 |
| Diuretic, n (%) | 201 (10.3) | 0 |
| Isosorbide mononitrate, n (%) | 1781 (91.4) | 0 |
| ASA III, n (%)¶¶ | 1939 (99.5) | 0 |
| NYHA II, n (%)## | 1875 (96.2) | 0 |
| MoCA, median (IQR)*** | 22 (19 – 25) | 0 |
| MMSE, median (IQR)††† | 26 (22 – 28) | 0 |
| MET score, median (IQR)‡‡‡ | 4.5 (3.0 – 4.5) | 0 |
| EuroSCORE, median (IQR)§§§ | 4 (3 – 5) | 0 |
| Age-adjusted CCI, median (IQR)¶¶¶ | 5 (4 – 7) | 0 |
| Left SctO2 (%), mean (SD)### | 73 (4) | 0 |
| Right SctO2 (%), mean (SD)### | 71 (5) | 0 |
| Forearm SstO2 (%), mean (SD)### | 74 (5) | 0 |
| Cardiac output (L/min), mean (SD)### | 4.5 (1.5) | 0 |
| Cardiac index (L/min/m2), mean (SD)### | 2.5 (0.8) | 0 |
| Stroke volume (mL), median (IQR)### | 64 (53 – 79) | 0 |
| SVR (dyn·s·cm-5), median (IQR)### | 1545 (1263 – 1903) | 0 |
| Heart rate (bpm), median (IQR)### | 67 (61 – 74) | 0 |
| Systolic blood pressure (mmHg), mean (SD)### | 126 (18) | 0 |
| Diastolic blood pressure (mmHg), mean (SD)### | 68 (11) | 0 |
| Mean arterial pressure (mmHg), mean (SD) ### | 90 (12) | 0 |
| ALT (U/L), median (IQR) | 18 (13 – 27) | 24 (1.2) |
| AST (U/L), median (IQR) | 18 (15 – 24) | 24 (1.2) |
| Albumin (g/dL), median (IQR) | 41 (39 – 43) | 30 (1.5) |
| BUN (mmol/L), median (IQR) | 5.6 (4.6 – 6.9) | 6 (0.3) |
| Creatine (μmol/L), median (IQR) | 77 (66 – 88) | 0 |
| Uric acid (μmol/L), median (IQR) | 316 (263 – 375)) | 7 (0.4) |
| eGFR(mL/min/1.73 m2), median (IQR)**** | 93 (81 – 99) | 0 |
| Troponin T (ug/L), median (IQR) | 0.02 (0.01 – 0.04) | 0 |
| Creatine kinase (U/L), median (IQR) | 65 (48 – 92) | 0 |
| Creatine kinase-MB (U/L), median (IQR) | 14 (11 – 17) | 0 |
| Lactate dehydrogenase (U/L), median (IQR) | 184 (161 – 214) | 27 (1.4) |
| C-reactive protein (mg/L), median (IQR)†††† | 1.9 (0.8 – 5.0) | 271 (13.9) |
| B-type natriuretic peptide (pg/mL), median (IQR) | 53 (20 – 148) | 0 |
| Diameter of aortic sinus (mm), median (IQR) | 34 (32 – 36) | 377 (19.3) |
| Diameter of left atrium (mm), median (IQR) | 38 (35 – 41) | 8 (0.4) |
| LVED (mm), median (IQR) | 51 (48 – 55) | 9 (0.5) |
| Interventricular septum (mm), median (IQR) | 10 (9 – 12) | 317 (16.3) |
| Diameter of right ventricle (mm), median (IQR) | 33 (31 – 35) | 366 (18.8) |
| PAP (mmHg), median (IQR) | 30 (30 – 30) | 7 (0.4) |
| Left ventricular EF (%), median (IQR) | 59 (55 – 62) | 0 |
| Guided care group, n (%)‡‡‡‡ | 975 (50) | 0 |

SD, standard deviation; ACEI, angiotensin-converting enzyme inhibitors; ASA, American society of anesthesiologists; NYHA, New York heart association; MoCA, Montreal cognitive assessment; IQR, interquartile range; MMSE, mini-mental state examination; MET, metabolic equivalent of task; EuroSCORE, European system for cardiac operative risk evaluation; CCI, Charlson comorbidity index; SctO2, cerebral tissue oxygen saturation; SstO2, somatic tissue oxygen saturation; SVR, systemic vascular resistance; ALT, alanine transaminase; AST, aspartate aminotransferase; BUN, blood urea nitrogen; eGFR, estimated glomerular filtration rate; LVED, left ventricular end-diastolic diameter; PAP, pulmonary artery pressure; EF, ejection fraction

* Summary statistics are reported as n (%) for categorical variables and as mean (SD) or median (IQR) for continuous variables.

† Smoking was defined as a self-reported history of tobacco use, as obtained during the preoperative interview.

‡ Drinking was defined as a self-reported history of alcohol consumption, excluding occasional or purely social drinking, as obtained during the preoperative interview.

§ Myocardial infarction was defined as a prior event confirmed by clinical presentation, electrocardiographic changes, elevated cardiac biomarkers, or imaging evidence of myocardial infarction.

¶ Arrhythmia was defined as an abnormal cardiac electrical rhythm that was symptomatic, required treatment, or prompted further diagnostic evaluation.

# Diabetes was defined as a documented clinical diagnosis established according to standard care practices.

** Hypertension was defined as a documented clinical diagnosis or recorded use of antihypertensive medication, in accordance with standard medical practice.

†† Carotid artery disease was defined as ≥50% stenosis in at least one carotid artery, as identified by preoperative carotid ultrasound screening.
‡‡ These pre-operative comorbidities were identified based on patients’ self-reported medical history during the preoperative assessment.

§§ Antidiabetic agents were defined as any pharmacologic treatments used for the management of established diabetes, including both orally administered medications and the use of insulin.

¶¶ ASA III refers to ASA Physical Status Classification III, which describes a patient with a severe systemic disease that is not life-threatening.

## NYHA II refers to New York Heart Association Functional Class II, which indicates slight limitation of physical activity. Patients are comfortable at rest, but ordinary physical activity results in fatigue, palpitation, dyspnea, or angina.

*** MoCA refers to the Montreal Cognitive Assessment, a 30-point screening tool designed to detect mild cognitive impairment by evaluating multiple cognitive domains, including attention, memory, language, visuospatial abilities, executive functions, and orientation.

††† MMSE is a 30-point test used to assess cognitive function, including orientation, memory, attention, language, and visuospatial ability. Scores below 24 typically indicate cognitive impairment.

‡‡‡ MET score is a unit used to assess functional capacity. One MET equals 3.5 mL of oxygen uptake per kilogram per minute at rest.

§§§ EuroSCORE is a predictive model used to estimate perioperative mortality risk in cardiac surgery based on preoperative patient characteristics and procedural factors.

¶¶¶ The age-adjusted CCI quantifies comorbid conditions based on their number and severity, with additional points assigned for increasing age. The original CCI includes 17 weighted comorbidities, while the age-adjusted version incorporates age to improve risk stratification and predictive accuracy for clinical outcomes.1

### All these physiological measurements were taken 24 to 48 hours preoperatively with patients in a supine position, eyes closed, and breathing room air on the ward.

**** eGFR was calculated using the 2021 Chronic Kidney Disease Epidemiology Collaboration (CKD-EPI) equation.2

†††† C-reactive protein values were missing for 271 patients (13.9%). Multiple imputations by chained equations (50 imputations) were performed using the R package ‘mice’ with the Predictive Mean Matching method. The imputed datasets were combined using Rubin’s rules.

‡‡‡‡ Each patient was randomly assigned to either the guided care group or the usual care group as part of the Bottomline-CS randomized controlled trial, which was designed to evaluate the effectiveness of guided care interventions.3

**Supplementary Table 2:** Preoperative baseline characteristics with patients grouped by cardiac index <3.0 L/min/m2 vs. ≥3.0 L/min/m2

| **Characteristics*** | **Cardiac index <3.0 L/min/m2**  **(n = 1509)** | **Cardiac index ≥3.0 L/min/m2**  **(n = 440)** | **Absolute**  **Standardized Difference** |
| --- | --- | --- | --- |
| Age (year), mean (SD) | 69(5) | 68 (5) | 0.198 |
| Male, n (%) | 1130 (74.9) | 234 (53.2) | 0.464 |
| Height (cm), mean (SD) | 168 (8) | 166 (8) | 0.311 |
| Weight (kg), mean (SD) | 71 (11) | 72 (12) | 0.150 |
| Body mass index (kg/m2), mean (SD) | 25.0 (3.1) | 26.3 (3.5) | 0.394 |
| Smoking, n (%)† | 912 (60.4) | 212 (48.2) | 0.248 |
| Drinking, n (%)‡ | 406 (26.9) | 92 (20.9) | 0.141 |
| Myocardial infarction, n (%)§ | 438 (29.0) | 107 (24.3) | 0.107 |
| Arrhythmia, n (%)¶ | 143 (9.5) | 43 (9.8) | 0.010 |
| Diabetes, n (%)# | 619 (41.0) | 224 (50.9) | 0.199 |
| Hypertension, n (%)** | 1065 (70.6) | 357 (81.1) | 0.249 |
| Carotid artery disease, n (%)†† | 329 (21.8) | 153 (34.8) | 0.291 |
| Metabolic disease, n (%)‡‡ | 31 (2.1) | 11 (2.5) | 0.030 |
| Gastrointestinal disease, n (%)‡‡ | 49 (3.2) | 14 (3.2) | 0.004 |
| Hematological system disease, n (%)‡‡ | 2 (0.1) | 2 (0.5) | 0.060 |
| Cancer, n (%)‡‡ | 4 (0.3) | 2 (0.5) | 0.032 |
| Cognitive dysfunction, n (%)‡‡ | 6 (0.4) | 1 (0.2) | 0.031 |
| Pulmonary disease, n (%)‡‡ | 35 (2.3) | 11 (2.5) | 0.012 |
| Renal diseases, n (%)‡‡ | 12 (0.8) | 5 (1.1) | 0.035 |
| Liver disease, n (%)‡‡ | 6 (0.4) | 3 (0.7) | 0.039 |
| Beta blocker, n(%) | 1280 (84.8) | 384 (87.3) | 0.071 |
| ACEI, n (%) | 47 (3.1) | 16 (3.6) | 0.029 |
| Calcium channel blocker, n (%) | 573 (38.0) | 228 (51.8) | 0.281 |
| Angiotensin receptor blocker, n (%) | 524 (34.7) | 171 (38.9) | 0.086 |
| Statin, n (%) | 1473 (97.6) | 429 (97.5) | 0.007 |
| Anticoagulant, n (%) | 1486 (98.5) | 433 (98.4) | 0.005 |
| Antidiabetic, n (%)§§ | 670 (44.4) | 229 (52.0) | 0.153 |
| Diuretic, n (%) | 168 (11.1) | 33 (7.5) | 0.125 |
| Isosorbide mononitrate, n (%) | 1378 (91.3) | 403 (91.6) | 0.010 |
| ASA III, n (%)¶¶ | 1502 (99.5) | 437 (99.3) | 0.029 |
| NYHA II, n (%)## | 1454 (96.4) | 421 (95.7) | 0.034 |
| MoCA, median (IQR)*** | 22 (19 – 25) | 22 (18 – 25) | 0.061 |
| MMSE, median (IQR)††† | 26 (23 – 28) | 26 (22 – 27) | 0.054 |
| MET score, median (IQR)‡‡‡ | 4.5 (3.0 – 4.5) | 4.5 (3.0 – 4.5) | 0.096 |
| EuroSCORE, median (IQR)§§§ | 4 (3 – 5) | 4 (3 – 5) | 0.055 |
| Age adjusted CCI, median (IQR)¶¶¶ | 5 (4 – 6) | 5 (5 – 7) | 0.107 |
| Left SctO2 (%), mean (SD)### | 72 (4) | 74 (4) | 0.369 |
| Right SctO2 (%), mean (SD)### | 71 (4) | 72 (5) | 0.303 |
| Forearm SstO2 (%), mean (SD)### | 74 (5) | 75 (5) | 0.153 |
| Cardiac output (L/min), mean (SD)### | 3.9 (0.9) | 6.5 (1.2) | 2.436 |
| Cardiac index (L/min/m2), mean (SD)### | 2.2 (0.5) | 3.6 (0.6) | 2.739 |
| Stroke volume (mL), median (IQR)### | 59 (49 – 70) | 88 (78 – 100) | 1.647 |
| SVR (dyn·s·cm-5), median (IQR)### | 1673 (1432 – 2005) | 1086 (954 – 1254) | 1.511 |
| Heart rate (bpm), median (IQR)### | 66 (60 – 72) | 73 (66 – 80) | 0.692 |
| Systolic blood pressure (mmHg), mean (SD)### | 123 (16) | 138 (18) | 0.941 |
| Diastolic blood pressure (mmHg), mean (SD)### | 69 (11) | 64 (11) | 0.401 |
| Mean arterial pressure (mmHg), mean (SD) ### | 89 (12) | 94 (13) | 0.394 |
| ALT (U/L), median (IQR) | 18 (13 – 27) | 18 (12 – 27) | 0.015 |
| AST (U/L), median (IQR) | 18 (15 – 25) | 17 (14 – 23) | 0.125 |
| Albumin (g/dL), median (IQR) | 41 (39 – 43) | 41 (40 – 43) | 0.043 |
| BUN (mmol/L), median (IQR) | 5.6 (4.6 – 6.9) | 5.5 (4.5 – 6.8) | 0.040 |
| Creatine (μmol/L), median (IQR) | 78 (67 – 88) | 74 (63 – 88) | 0.087 |
| Uric acid (μmol/L), median (IQR) | 315 (261 – 372) | 317 (271 – 383) | 0.097 |
| eGFR(mL/min/1.73 m2), median (IQR)**** | 93 (80 – 98) | 95 (81 – 100) | 0.085 |
| Troponin T (ug/L), median (IQR) | 0.02 (0.01 – 0.04) | 0.02 (0.01 – 0.04) | 0.072 |
| Creatine kinase (U/L), median (IQR) | 66 (48 – 94) | 62 (46 – 89) | 0.030 |
| Creatine kinase-MB (U/L), median (IQR) | 14 (11 – 17) | 14 (11 – 17) | 0.032 |
| Lactate dehydrogenase (U/L), median (IQR) | 184 (161 – 214) | 185 (163 – 214) | 0.035 |
| C-reactive protein (mg/L), median (IQR)†††† | 1.8 (0.8 – 5.0) | 2.2 (0.9 – 5.4) | 0.047 |
| B-type natriuretic peptide (pg/mL), median (IQR) | 53 (20 – 153) | 53 (20 – 138) | 0.061 |
| Diameter of aortic sinus (mm), median (IQR) | 34 (32 – 36) | 33 (31 – 36) | 0.236 |
| Diameter of left atrium (mm), median (IQR) | 37 (35 – 41) | 38 (35 – 41) | 0.044 |
| LVED (mm), median (IQR) | 51 (48 – 55) | 51 (48 – 54) | 0.181 |
| Interventricular septum (mm), median (IQR) | 10 (9 – 12) | 11 (10 – 12) | 0.203 |
| Diameter of right ventricle (mm), median (IQR) | 33 (31 – 35) | 32 (30 – 35) | 0.122 |
| PAP (mmHg), median (IQR) | 30 (30 – 30) | 30 (30 – 30) | 0.145 |
| Left ventricular EF (%), median (IQR) | 59 (55 – 62) | 59 (56 – 62) | 0.092 |
| Guided care group, n (%)‡‡‡‡ | 757 (50.2) | 218 (49.5) | 0.012 |

SD, standard deviation; ACEI, angiotensin-converting enzyme inhibitors; ASA, American society of anesthesiologists; NYHA, New York heart association; MoCA, Montreal cognitive assessment; IQR, interquartile range; MMSE, mini-mental state examination; MET, metabolic equivalent of task; EuroSCORE, European system for cardiac operative risk evaluation; CCI, Charlson comorbidity index; SctO2, cerebral tissue oxygen saturation; SstO2, somatic tissue oxygen saturation; SVR, systemic vascular resistance; ALT, alanine transaminase; AST, aspartate aminotransferase; BUN, blood urea nitrogen; eGFR, estimated glomerular filtration rate; LVED, left ventricular end-diastolic diameter; PAP, pulmonary artery pressure; EF, ejection fraction

* Summary statistics are reported as n (%) for categorical variables and as mean (SD) or median (IQR) for continuous variables.

† Smoking was defined as a self-reported history of tobacco use, as obtained during the preoperative interview.

‡ Drinking was defined as a self-reported history of alcohol consumption, excluding occasional or purely social drinking, as obtained during the preoperative interview.

§ Myocardial infarction was defined as a prior event confirmed by clinical presentation, electrocardiographic changes, elevated cardiac biomarkers, or imaging evidence of myocardial infarction.

¶ Arrhythmia was defined as an abnormal cardiac electrical rhythm that was symptomatic, required treatment, or prompted further diagnostic evaluation.

# Diabetes was defined as a documented clinical diagnosis established according to standard care practices.

** Hypertension was defined as a documented clinical diagnosis or recorded use of antihypertensive medication, in accordance with standard medical practice.

†† Carotid artery disease was defined as ≥50% stenosis in at least one carotid artery, as identified by preoperative carotid ultrasound screening.
‡‡ These pre-operative comorbidities were identified based on patients’ self-reported medical history during the preoperative assessment.

§§ Antidiabetic agents were defined as any pharmacologic treatments used for the management of established diabetes, including both orally administered medications and the use of insulin.

¶¶ ASA III refers to ASA Physical Status Classification III, which describes a patient with a severe systemic disease that is not life-threatening.

## NYHA II refers to New York Heart Association Functional Class II, which indicates slight limitation of physical activity. Patients are comfortable at rest, but ordinary physical activity results in fatigue, palpitation, dyspnea, or angina.

*** MoCA refers to the Montreal Cognitive Assessment, a 30-point screening tool designed to detect mild cognitive impairment by evaluating multiple cognitive domains, including attention, memory, language, visuospatial abilities, executive functions, and orientation.

††† MMSE is a 30-point test used to assess cognitive function, including orientation, memory, attention, language, and visuospatial ability. Scores below 24 typically indicate cognitive impairment.

‡‡‡ MET score is a unit used to assess functional capacity. One MET equals 3.5 mL of oxygen uptake per kilogram per minute at rest.

§§§ EuroSCORE is a predictive model used to estimate perioperative mortality risk in cardiac surgery based on preoperative patient characteristics and procedural factors.

¶¶¶ The age-adjusted CCI quantifies comorbid conditions based on their number and severity, with additional points assigned for increasing age. The original CCI includes 17 weighted comorbidities, while the age-adjusted version incorporates age to improve risk stratification and predictive accuracy for clinical outcomes.1

### All these physiological measurements were taken 24 to 48 hours preoperatively with patients in a supine position, eyes closed, and breathing room air on the ward.

**** eGFR was calculated using the 2021 Chronic Kidney Disease Epidemiology Collaboration (CKD-EPI) equation.2

†††† C-reactive protein values were missing for 271 patients (13.9%). Multiple imputations by chained equations (50 imputations) were performed using the R package ‘mice’ with the Predictive Mean Matching method. The imputed datasets were combined using Rubin’s rules.

‡‡‡‡ Each patient was randomly assigned to either the guided care group or the usual care group as part of the Bottomline-CS randomised controlled trial, which was designed to evaluate the effectiveness of guided care interventions.3

**Supplementary Table 3:** Demographic and preoperative characteristics in propensity score-matching with patients grouped by cardiac index <3.0 L/min/m2 vs. ≥3.0 L/min/m2

| Characteristics* | Pre-match | | Post-match | |
| --- | --- | --- | --- | --- |
| Cardiac index <3.0 L/min/m2  (n = 1509) | Cardiac index ≥3.0 L/min/m2  (n = 440) | Cardiac index <3.0 L/min/m2  (n = 942) | Cardiac index ≥3.0 L/min/m2  (n = 314) |
| Age (year), mean (SD) | 69 (5) | 68 (5) | 68 (5) | 68 (5) |
| Male, n (%) | 1130 (74.9) | 234 (53.2) | 616 (65.4) | 203 (64.6) |
| Height (cm), mean (SD) | 168 (8) | 166 (8) | 167 (8) | 167 (8) |
| Body mass index (kg/m2), mean (SD) | 25.0 (3.1) | 26.3 (3.5) | 25.6 (3.1) | 25.8 (3.3) |
| Smoking, n (%)† | 912 (60.4) | 212 (48.2) | 506 (53.7) | 167 (53.2) |
| Drinking, n (%)‡ | 406 (26.9) | 92 (20.9) | 228 (24.2) | 79 (25.2) |
| Myocardial infarction, n (%)§ | 438 (29.0) | 107 (24.3) | 238 (25.3) | 81 (25.8) |
| Arrhythmia, n (%)¶ | 143 (9.5) | 43 (9.8) | 95 (10.1) | 29 (9.2) |
| Diabetes, n (%)# | 619 (41.0) | 224 (50.9) | 430 (45.6) | 133 (42.4) |
| Hypertension, n (%)** | 1065 (70.6) | 357 (81.1) | 720 (76.4) | 236 (75.2) |
| Carotid artery disease, n (%)†† | 329 (21.8) | 153 (34.8) | 270 (28.7) | 87 (27.7) |
| Age adjusted CCI, median (IQR ) ‡‡ | 5 (4 – 6) | 6 (5 – 7) | 5 (4 – 7) | 5 (5 – 7) |
| Beta blocker, n (%) | 1280 (84.8) | 384 (87.3) | 807 (85.7) | 268 (85.4) |
| ACEI, n (%) | 47 (3.1) | 16 (3.6) | 33 (3.5) | 11 (3.5) |
| Calcium channel blocker, n (%) | 573 (38.0) | 228 (51.8) | 430 (45.6) | 137 (43.6) |
| Angiotensin receptor blocker, n (%) | 524 (34.7) | 171 (38.9) | 329 (34.9) | 107 (34.1) |
| Antidiabetic, n (%)§§ | 670 (44.4) | 229 (52.0) | 441 (46.8) | 144 (45.9) |
| Diuretic, n (%) | 168 (11.1) | 33 (7.5) | 78 (8.3) | 25 (8.0) |
| MAP (mmHg), mean (SD)¶¶ | 89 (12) | 94 (13) | 92 (12) | 92 (13) |
| C-reactive protein (mg/L), median (IQR)## | 1.8 (0.8 – 5.0) | 2.2 (0.9 – 5.4) | 1.9 (0.8 – 5.0) | 2.2 (0.9 – 5.4) |
| eGFR (mL/min/1.73 m2), median (IQR)*** | 93 (80 – 98) | 95 (81 – 100) | 94 (81 – 99) | 93 (81 – 99) |
| Guided care group, n (%)††† | 757 (50.2) | 218 (49.5) | 474 (50.3) | 158 (50.3) |

SD, standard deviation; CCI, Charlson comorbidity index; IQR, interquartile range; ACEI, angiotensin-converting enzyme inhibitors; MAP, mean arterial pressure; eGFR, estimated glomerular filtration rate

* Summary statistics are reported as n (%) for categorical variables and as mean (SD) or median (IQR) for continuous variables.

† Smoking was defined as a self-reported history of tobacco use, as obtained during the preoperative interview.

‡ Drinking was defined as a self-reported history of alcohol consumption, excluding occasional or purely social drinking, as obtained during the preoperative interview.

§ Myocardial infarction was defined as a prior event confirmed by clinical presentation, electrocardiographic changes, elevated cardiac biomarkers, or imaging evidence of myocardial infarction.

¶ Arrhythmia was defined as an abnormal cardiac electrical rhythm that was symptomatic, required treatment, or prompted further diagnostic evaluation.

# Diabetes was defined as a documented clinical diagnosis established according to standard care practices.

** Hypertension was defined as a documented clinical diagnosis or recorded use of antihypertensive medication, in accordance with standard medical practice.

†† Carotid artery disease was defined as ≥50% stenosis in at least one carotid artery, as identified by preoperative carotid ultrasound screening.

‡‡ The age-adjusted CCI quantifies comorbid conditions based on their number and severity, with additional points assigned for increasing age. The original CCI includes 17 weighted comorbidities, while the age-adjusted version incorporates age to improve risk stratification and predictive accuracy for clinical outcomes.1

§§ Antidiabetic agents were defined as any pharmacologic treatments used for the management of established diabetes, including both orally administered medications and the use of insulin.

¶¶ MAP was measured 24 to 48 hours before surgery with patients resting in a supine position, eyes closed, and breathing room air in a quiet ward environment.

## C-reactive protein values were missing for 271 patients (13.9%). Multiple imputations by chained equations (50 imputations) were performed using the R package ‘mice’ with the Predictive Mean Matching method. The imputed datasets were combined using Rubin’s rules.

*** eGFR was calculated using the 2021 Chronic Kidney Disease Epidemiology Collaboration (CKD-EPI) equation.2

††† Each patient was randomly assigned to either the guided care group or the usual care group as part of the Bottomline-CS randomised controlled trial, which was designed to evaluate the effectiveness of guided care interventions.3

**Supplementary Table 4:** Demographic and preoperative characteristics in propensity score-matching with patients grouped by cardiac index < 3.5 L/min/m² vs. ≥ 3.5 L/min/m²

| Characteristics* | Pre-match | | Post-match | |
| --- | --- | --- | --- | --- |
| Cardiac index <3.5 L/min/m2  (n = 1746) | Cardiac index ≥3.5 L/min/m2  (n = 203) | Cardiac index <3.5 L/min/m2  (n = 692) | Cardiac index ≥3.5 L/min/m2  (n = 173) |
| Age (year), mean (SD) | 69 (5) | 68 (5) | 68 (5) | 68 (5) |
| Male, n (%) | 1272 (72.9) | 92 (45.3) | 361 (52.2) | 90 (52.0) |
| Height (cm), mean (SD) | 168 (8) | 165 (8) | 166 (8) | 166 (8) |
| Body mass index (kg/m2), mean (SD) | 25.1 (3.2) | 26.4 (3.8) | 26.0 (3.3) | 26.1 (3.7) |
| Smoking, n (%)† | 1033 (59.2) | 91 (44.8) | 330 (47.7) | 83 (48.0) |
| Drinking, n (%)‡ | 462 (26.5) | 36 (17.7) | 132 (19.1) | 34 (19.7) |
| Myocardial infarction, n (%)§ | 498 (28.5) | 47 (23.2) | 167 (24.1) | 43 (24.9) |
| Arrhythmia, n (%)¶ | 169 (9.7) | 17 (8.4) | 60 (8.7) | 16 (9.2) |
| Diabetes, n (%)# | 738 (42.3) | 105 (51.7) | 324 (46.8) | 81 (46.8) |
| Hypertension, n (%)** | 1254 (71.8) | 168 (82.8) | 559 (80.8) | 138 (79.8) |
| Carotid artery disease, n (%)†† | 413 (23.7) | 69 (34.0) | 210 (30.3) | 51 (29.5) |
| Age adjusted CCI, median (IQR ) ‡‡ | 5 (4 – 7) | 5 (5 – 7) | 5 (4 – 7) | 5.5 (5 – 7) |
| Beta blocker, n (%) | 1495 (85.6) | 169 (83.3) | 578 (83.5) | 145 (83.8) |
| ACEI, n (%) | 53 (3.0) | 10 (4.9) | 34 (4.9) | 7 (4.0) |
| Calcium channel blocker, n (%) | 694 (39.7) | 107 (52.7) | 345 (49.9) | 85 (49.1) |
| Angiotensin receptor blocker, n (%) | 612 (35.1) | 83 (40.9) | 253 (36.6) | 65 (37.6) |
| Antidiabetic, n (%)§§ | 790 (45.2) | 109 (53.7) | 355 (51.3) | 84 (48.6) |
| Diuretic, n (%) | 190 (10.9) | 11 (5.4) | 35 (5.1) | 10 (5.8) |
| MAP (mmHg), mean (SD)¶¶ | 90 (12) | 94 (12) | 93 (13) | 93 (12) |
| C-reactive protein (mg/L), median (IQR)## | 1.8 (0.8 – 5.0) | 2.2 (1.0 – 5.0) | 2.1 (0.8 – 5.3) | 2.2 (1.0 – 5.0) |
| eGFR (mL/min/1.73 m2), median (IQR)*** | 93 (81 – 99) | 95 (80 – 101) | 95 (82 – 100) | 95 (81 – 101) |
| Guided care group, n (%)††† | 873 (50.0) | 102 (50.2) | 348 (50.3) | 88 (50.9) |

SD, standard deviation; CCI, Charlson comorbidity index; IQR, interquartile range; ACEI, angiotensin-converting enzyme inhibitors; MAP, mean arterial pressure; eGFR, estimated glomerular filtration rate

* Summary statistics are reported as n (%) for categorical variables and as mean (SD) or median (IQR) for continuous variables.

† Smoking was defined as a self-reported history of tobacco use, as obtained during the preoperative interview.

‡ Drinking was defined as a self-reported history of alcohol consumption, excluding occasional or purely social drinking, as obtained during the preoperative interview.

§ Myocardial infarction was defined as a prior event confirmed by clinical presentation, electrocardiographic changes, elevated cardiac biomarkers, or imaging evidence of myocardial infarction.

¶ Arrhythmia was defined as an abnormal cardiac electrical rhythm that was symptomatic, required treatment, or prompted further diagnostic evaluation.

# Diabetes was defined as a documented clinical diagnosis established according to standard care practices.

** Hypertension was defined as a documented clinical diagnosis or recorded use of antihypertensive medication, in accordance with standard medical practice.

†† Carotid artery disease was defined as ≥50% stenosis in at least one carotid artery, as identified by preoperative carotid ultrasound screening.

‡‡ The age-adjusted CCI quantifies comorbid conditions based on their number and severity, with additional points assigned for increasing age. The original CCI includes 17 weighted comorbidities, while the age-adjusted version incorporates age to improve risk stratification and predictive accuracy for clinical outcomes.1

§§ Antidiabetic agents are defined as any pharmacologic treatments used for the management of established diabetes, including both orally administered medications and the use of insulin.

¶¶ MAP was measured 24 to 48 hours before surgery with patients resting in a supine position, eyes closed, and breathing room air in a quiet ward environment.

## C-reactive protein values were missing for 271 patients (13.9%). Multiple imputations by chained equations (50 imputations) were performed using the R package ‘mice’ with the Predictive Mean Matching method. The imputed datasets were combined using Rubin’s rules.

*** eGFR was calculated using the 2021 Chronic Kidney Disease Epidemiology Collaboration (CKD-EPI) equation.2

††† Each patient was randomly assigned to either the guided care group or the usual care group as part of the Bottomline-CS randomised controlled trial, which was designed to evaluate the effectiveness of guided care interventions.3

**Supplementary Table 5:** Demographic and preoperative characteristics in propensity score-matching with patients grouped by cardiac output < 5.0 L/min vs. ≥ 5.0 L/min

| Characteristics* | Pre-match | | Post-match | |
| --- | --- | --- | --- | --- |
| Cardiac output <5.0 L/min  (n = 1351) | Cardiac output ≥5 L/min  (n = 598) | Cardiac output <5.0 L/min  (n = 828) | Cardiac output ≥5 L/min  (n = 414) |
| Age (year), mean (SD) | 69 (5) | 68 (5) | 69 (5) | 69 (5) |
| Male, n (%) | 972 (71.9) | 392 (65.6) | 574 (69.3) | 285 (68.8) |
| Height (cm), mean (SD) | 167 (8) | 168 (8) | 168 (8) | 168 (7) |
| Body mass index (kg/m2), mean (SD)z | 24.7 (3.1) | 26.6 (3.3) | 25.6 (2.9) | 25.8 (2.8) |
| Smoking, n (%)† | 798 (59.1) | 326 (54.5) | 472 (57.0) | 232 (56.0) |
| Drinking, n (%)‡ | 360 (26.6) | 138 (23.1) | 220 (26.6) | 107 (25.8) |
| Myocardial infarction, n (%)§ | 393 (29.1) | 152 (25.4) | 212 (25.6) | 110 (26.6) |
| Arrhythmia, n (%)¶ | 126 (9.3) | 60 (10.0) | 83 (10.0) | 38 (9.2) |
| Diabetes, n (%)# | 534 (39.5) | 309 (51.7) | 380 (45.9) | 186 (44.9) |
| Hypertension, n (%)** | 943 (69.8) | 479 (80.1) | 632 (76.3) | 314 (75.8) |
| Carotid artery disease, n (%)†† | 295 (21.8) | 187 (31.3) | 229 (27.7) | 110 (26.6) |
| Age adjusted CCI, median (IQR ) ‡‡ | 5 (4 – 6) | 5 (5 – 7) | 5 (4 – 7) | 5 (5 – 7) |
| Beta blocker, n (%) | 1145 (84.8) | 519 (86.8) | 706 (85.3) | 354 (85.5) |
| ACEI, n (%) | 41 (3.0) | 22 (3.7) | 31 (3.7) | 16 (3.9) |
| Calcium channel blocker, n (%) | 504 (37.3) | 297 (49.7) | 371 (44.8) | 176 (42.5) |
| Angiotensin receptor blocker, n (%) | 470 (34.8) | 225 (37.6) | 299 (36.1) | 145 (35.0) |
| Antidiabetic, n (%)§§ | 589 (43.6) | 310 (51.8) | 382 (46.1) | 199 (48.1) |
| Diuretic, n (%) | 154 (11.4) | 47 (7.9) | 64 (7.7) | 34 (8.2) |
| MAP (mmHg), mean (SD)¶¶ | 88 (12) | 94 (13) | 91 (12) | 91 (13) |
| C-reactive protein (mg/L), median (IQR)## | 1.8 (0.8 – 4.9) | 2.1 (0.9 – 5.4) | 1.9 (0.8 – 4.7) | 2.1 (0.8 – 5.2) |
| eGFR (mL/min/1.73 m2), median (IQR)*** | 93 (81 – 98) | 94 (80 – 99) | 93 (80 – 98) | 93 (81 – 99) |
| Guided care group, n (%)††† | 677 (50.1) | 298 (49.8) | 421 (50.8) | 202 (48.8) |

SD, standard deviation; CCI, Charlson comorbidity index; IQR, interquartile range; ACEI, angiotensin-converting enzyme inhibitors; MAP, mean arterial pressure; eGFR, estimated glomerular filtration rate

* Summary statistics are reported as n (%) for categorical variables and as mean (SD) or median (IQR) for continuous variables.

† Smoking was defined as a self-reported history of tobacco use, as obtained during the preoperative interview.

‡ Drinking was defined as a self-reported history of alcohol consumption, excluding occasional or purely social drinking, as obtained during the preoperative interview.

§ Myocardial infarction was defined as a prior event confirmed by clinical presentation, electrocardiographic changes, elevated cardiac biomarkers, or imaging evidence of myocardial infarction.

¶ Arrhythmia was defined as an abnormal cardiac electrical rhythm that was symptomatic, required treatment, or prompted further diagnostic evaluation.

# Diabetes was defined as a documented clinical diagnosis established according to standard care practices.

** Hypertension was defined as a documented clinical diagnosis or recorded use of antihypertensive medication, in accordance with standard medical practice.

†† Carotid artery disease was defined as ≥50% stenosis in at least one carotid artery, as identified by preoperative carotid ultrasound screening.

‡‡ The age-adjusted CCI quantifies comorbid conditions based on their number and severity, with additional points assigned for increasing age. The original CCI includes 17 weighted comorbidities, while the age-adjusted version incorporates age to improve risk stratification and predictive accuracy for clinical outcomes.1

§§ Antidiabetic agents were defined as any pharmacologic treatments used for the management of established diabetes, including both orally administered medications and the use of insulin.

¶¶ MAP was measured 24 to 48 hours before surgery with patients resting in a supine position, eyes closed, and breathing room air in a quiet ward environment.

## C-reactive protein values were missing for 271 patients (13.9%). Multiple imputations by chained equations (50 imputations) were performed using the R package ‘mice’ with the Predictive Mean Matching method. The imputed datasets were combined using Rubin’s rules.

*** eGFR was calculated using the 2021 Chronic Kidney Disease Epidemiology Collaboration (CKD-EPI) equation.2

††† Each patient was randomly assigned to either the guided care group or the usual care group as part of the Bottomline-CS randomised controlled trial, which was designed to evaluate the effectiveness of guided care interventions.3

**Supplementary Table 6:** Demographic and preoperative characteristics before propensity score-matching with patients grouped by cardiac output < 6.0 L/min vs. ≥ 6.0 L/min

| Characteristics* | Pre-match | | Post-match | |
| --- | --- | --- | --- | --- |
| Cardiac output <6.0 L/min  (n = 1672) | Cardiac output ≥6.0 L/min  (n = 277) | Cardiac output <6.0 L/min  (n = 804) | Cardiac output ≥6.0 L/min  (n = 201) |
| Age (year), mean (SD) | 69 (5) | 68 (5) | 68 (5) | 68 (5) |
| Male, n (%) | 1182 (70.7) | 182 (65.7) | 552 (68.7) | 136 (67.7) |
| Height (cm), mean (SD) | 167 (8) | 169 (8) | 168 (7) | 168 (7) |
| Body mass index (kg/m2), mean (SD) | 24.9 (3.1) | 27.3 (3.6) | 26 .1(3.0) | 26.2 (2.7) |
| Smoking, n (%)† | 976 (58.4) | 148 (53.4) | 443 (55.1) | 109 (54.2) |
| Drinking, n (%)‡ | 427 (25.5) | 71 (25.6) | 199 (24.8) | 56 (27.9) |
| Myocardial infarction, n (%)§ | 482 (28.8) | 63 (22.7) | 188 (23.4) | 49 (24.4) |
| Arrhythmia, n (%)¶ | 157 (9.4) | 29 (10.5) | 87 (10.8) | 20 (10.0) |
| Diabetes, n (%)# | 706 (42.2) | 137 (49.5) | 358 (44.5) | 92 (45.8) |
| Hypertension, n (%)** | 1199 (71.7) | 223 (80.5) | 625 (77.7) | 157 (78.1) |
| Carotid artery disease, n (%)†† | 390 (23.3) | 92 (33.2) | 246 (30.6) | 57 (28.4) |
| Age adjusted CCI, median (IQR ) ‡‡ | 5 (4 – 7) | 5 (5 – 7) | 5 (5 – 7) | 6 (5 – 7) |
| Beta blocker, n (%) | 1430 (85.5) | 234 (84.5) | 673 (83.7) | 169 (84.1) |
| ACEI, n (%) | 53 (3.2) | 10 (3.6) | 29 (3.6) | 7 (3.5) |
| Calcium channel blocker, n (%) | 662 (39.6) | 139 (50.2) | 364 (45.3) | 93 (46.3) |
| Angiotensin receptor blocker, n (%) | 591 (35.3) | 104 (37.5) | 290 (36.1) | 71 (35.3) |
| Antidiabetic, n (%)§§ | 755 (45.2) | 144 (52.0) | 387 (48.1) | 96 (47.8) |
| Diuretic, n (%) | 179 (10.7) | 22 (7.9) | 65 (8.1) | 13 (6.5) |
| MAP (mmHg), mean (SD)¶¶ | 89 (12) | 94 (12) | 93 (12) | 92 (12) |
| C-reactive protein (mg/L), median (IQR)## | 1.8 (0.8 – 5.0) | 2.2 (1.0 – 5.4) | 2.0 (0.8 – 5.3) | 2.2 (1.0 – 5.4) |
| eGFR (mL/min/1.73 m2), median (IQR)*** | 93 (81 – 99) | 93 (78 – 99) | 93 (81 – 99) | 93 (78 – 99) |
| Guided care group, n (%)††† | 835 (49.9) | 140 (50.5) | 402 (50.0) | 97 (48.3) |

SD, standard deviation; CCI, Charlson comorbidity index; IQR, interquartile range; ACEI, angiotensin-converting enzyme inhibitors; MAP, mean arterial pressure; eGFR, estimated glomerular filtration rate

* Summary statistics are reported as n (%) for categorical variables and as mean (SD) or median (IQR) for continuous variables.

† Smoking was defined as a self-reported history of tobacco use, as obtained during the preoperative interview.

‡ Drinking was defined as a self-reported history of alcohol consumption, excluding occasional or purely social drinking, as obtained during the preoperative interview.

§ Myocardial infarction was defined as a prior event confirmed by clinical presentation, electrocardiographic changes, elevated cardiac biomarkers, or imaging evidence of myocardial infarction.

¶ Arrhythmia was defined as an abnormal cardiac electrical rhythm that was symptomatic, required treatment, or prompted further diagnostic evaluation.

# Diabetes was defined as a documented clinical diagnosis established according to standard care practices.

** Hypertension was defined as a documented clinical diagnosis or recorded use of antihypertensive medication, in accordance with standard medical practice.

†† Carotid artery disease was defined as ≥50% stenosis in at least one carotid artery, as identified by preoperative carotid ultrasound screening.

‡‡ The age-adjusted CCI quantifies comorbid conditions based on their number and severity, with additional points assigned for increasing age. The original CCI includes 17 weighted comorbidities, while the age-adjusted version incorporates age to improve risk stratification and predictive accuracy for clinical outcomes.1

§§ Antidiabetic agents were defined as any pharmacologic treatments used for the management of established diabetes, including both orally administered medications and the use of insulin.

¶¶ MAP was measured 24 to 48 hours before surgery with patients resting in a supine position, eyes closed, and breathing room air in a quiet ward environment.

## C-reactive protein values were missing for 271 patients (13.9%). Multiple imputations by chained equations (50 imputations) were performed using the R package ‘mice’ with the Predictive Mean Matching method. The imputed datasets were combined using Rubin’s rules.

*** eGFR was calculated using the 2021 Chronic Kidney Disease Epidemiology Collaboration (CKD-EPI) equation.2

††† Each patient was randomly assigned to either the guided care group or the usual care group as part of the Bottomline-CS randomised controlled trial, which was designed to evaluate the effectiveness of guided care interventions.3

**Supplementary Table 7:** Association between preoperative cardiac index or cardiac output and acute kidney injury through crude and propensity score-based analyses

| Methods of analysis | Odds ratio (95% CI) | P value |
| --- | --- | --- |
| Cardiac index = 3.0 L/min/m2 | | |
| Crude analysis (n, 1509 vs. 440)* | 1.59 (1.17 to 2.18) | 0.004 |
| Adjusted for propensity score (n, 1509 vs. 440)† | 1.52 (1.08 to 2.13) | 0.016 |
| Propensity score-matched (n, 942 vs. 314)‡ | 1.69 (1.15 to 2.48) | 0.008 |
| Cardiac index = 3.5 L/min/m2 | | |
| Crude analysis (n, 1746 vs. 203)* | 2.23 (1.53 to 3.26) | <0.001 |
| Adjusted for propensity score (n, 1746 vs. 203)† | 2.19 (1.46 to 3.27) | <0.001 |
| Propensity score-matched (n, 692 vs. 173)‡ | 2.35 (1.50 to 3.68) | <0.001 |
| Cardiac output = 5.0 L/min | | |
| Crude analysis (n, 1351 vs. 598)* | 1.58 (1.18 to 2.12) | 0.002 |
| Adjusted for propensity score (n, 1351 vs. 598)† | 1.41 (1.02 to 1.95) | 0.036 |
| Propensity score-matched (n, 828 vs. 414)‡ | 1.56 (1.09 to 2.23) | 0.014 |
| Cardiac output = 6.0 L/min | | |
| Crude analysis (n, 1672 vs. 277)* | 2.10 (1.49 to 2.97) | <0.001 |
| Adjusted for propensity score (n, 1672 vs. 277)† | 1.89 (1.30 to 2.75) | <0.001 |
| Propensity score-matched (n, 804 vs. 201)‡ | 1.99 (1.26 to 3.16) | 0.003 |

CI, confidence interval

* Univariate logistic regression results (unadjusted for demographic or preoperative characteristics in Table 1)

† Results from multivariable logistic regression adjusted for demographic and preoperative characteristics (as listed in Table 1) and further controlled for the propensity score.

‡ Results from multivariable conditional logistic regression adjusted for the same covariates (see Table 1) and matched by propensity score.

**Supplementary Table 8:** Analysis of the mediation by the AUC below the ward baseline in the association between preoperative cardiac index <3.0 L/min/m² and acute kidney injury

| **Variables** | **Mediation effect (95% CI), P value** | | | |
| --- | --- | --- | --- | --- |
| **Total effect** | **Indirect effect** | **Direct effect** | **Mediation** |
| **AUC below 10% the ward baseline*** | | | | |
| Cardiac index | 0.05 (0.01, 0.09), 0.028 | 0.00 (-0.02, 0.03), 0.738 | 0.04 (-0.00, 0.09), 0.072 | 6.71% (-72.58%, 103.07%), 0.750 |
| Cardiac output | 0.05 (0.01, 0.09), 0.012 | 0.00 (-0.02, 0.02), 0.808 | 0.04 (-0.00, 0.10), 0.068 | 6.63% (-65.78%, 124.72%), 0.804 |
| Mean blood pressure | 0.05 (0.01, 0.09), 0.014 | 0.00 (-0.01, 0.01), 0.764 | 0.05 (0.01, 0.09), 0.018 | 2.91% (-35.45%, 31.84%), 0.774 |
| Systolic blood pressure | 0.05 (0.01, 0.09), 0.018 | 0.00 (-0.01, 0.02), 0.940 | 0.05 (0.01, 0.09), 0.032 | 1.76% (-59.71%, 55.11%), 0.942 |
| Diastolic blood pressure | 0.05 (0.01, 0.09), 0.014 | -0.00 (-0.00, 0.00), 0.998 | 0.05 (0.01, 0.09), 0.020 | -0.01% (-7.70%, 10.23%), 0.996 |
| Left SctO2 | 0.05 (0.01, 0.09), 0.024 | 0.00 (-0.00, 0.00), 0.590 | 0.05 (0.01, 0.09), 0.018 | 2.22% (-12.18%, 10.88%), 0.586 |
| Right SctO2 | 0.05 (0.01, 0.09), 0.008 | 0.00 (-0.00, 0.00), 0.808 | 0.05 (0.01, 0.09), 0.008 | 0.55% (-3.38%, 3.97%), 0.808 |
| SstO2 | 0.05 (0.01, 0.09), 0.006 | -0.00 (-0.00, 0.00), 0.432 | 0.05 (0.01, 0.09), 0.006 | -1.39% (-15.37%, 2.37%), 0.438 |
| Systemic vascular resistance | 0.05 (0.01, 0.09), 0.020 | -0.00 (-0.01, 0.01), 0.860 | 0.05 (0.01, 0.09), 0.018 | -1.58% (-35.49%, 31.78%), 0.860 |
| Heart rate | 0.05 (0.00, 0.09), 0.030 | -0.00 (-0.01, 0.01), 0.898 | 0.05 (0.01, 0.09), 0.030 | -0.84% (-60.36%, 25.66%), 0.896 |
| Stroke volume | 0.05 (0.01, 0.08), 0.026 | -0.00 (-0.02, 0.01), 0.554 | 0.05 (0.01, 0.09), 0.022 | -5.53% (-81.54%, 33.32%), 0.564 |
| **AUC below 20% the ward baseline*** | | | | |
| Cardiac index | 0.05 (0.01, 0.09), 0.020 | 0.00 (-0.02, 0.02), 0.996 | 0.05 (-0.00, 0.09), 0.052 | 0.88% (-75.01%, 88.60%), 0.992 |
| Cardiac output | 0.05 (0.01, 0.09), 0.020 | 0.00 (-0.02, 0.02), 0.960 | 0.05 (0.00, 0.10), 0.044 | 1.09% (-70.57%, 80.28%), 0.960 |
| Mean blood pressure | 0.05 (0.01, 0.09), 0.018 | 0.00 (-0.01, 0.01), 0.908 | 0.05 (0.01, 0.09), 0.016 | 1.41% (-30.78%, 35.14%), 0.898 |
| Systolic blood pressure | 0.05 (0.01, 0.09), 0.010 | 0.00 (-0.01, 0.01), 0.854 | 0.05 (0.01, 0.09), 0.026 | 3.60% (-44.21%, 50.49%), 0.856 |
| Diastolic blood pressure | 0.05 (0.01, 0.09), 0.014 | -0.00 (-0.00, 0.00), 0.962 | 0.05 (0.01, 0.09), 0.014 | -0.08% (-6.64%, 8.34%), 0.960 |
| Left SctO2 | 0.05 (0.01, 0.09), 0.010 | 0.00 (-0.00, 0.00), 0.782 | 0.05 (0.01, 0.09), 0.010 | 0.12% (-8.68%, 2.63%), 0.780 |
| Right SctO2 | 0.05 (0.01, 0.09), 0.028 | 0.00 (-0.00, 0.00), 0.904 | 0.05 (0.01, 0.09), 0.028 | 0.02% (-5.23%, 4.42%), 0.912 |
| Forearm SstO2 | 0.05 (0.01, 0.09), 0.006 | 0.00 (-0.00, 0.00), 0.914 | 0.05 (0.01, 0.09), 0.004 | 0.13% (-3.65%, 2.45%), 0.912 |
| Systemic vascular resistance | 0.05 (0.01, 0.09), 0.018 | -0.00 (-0.01, 0.01), 0.954 | 0.05 (0.01, 0.09), 0.018 | -0.78% (-27.93%, 28.80%), 0.956 |
| Heart rate | 0.05 (0.01, 0.09), 0.018 | -0.00 (-0.01, 0.01), 0.924 | 0.05 (0.01, 0.09), 0.020 | -0.46% (-28.84%, 24.97%), 0.930 |
| Stroke volume | 0.05 (0.01, 0.09), 0.012 | -0.00 (-0.01, 0.01), 0.486 | 0.05 (0.01, 0.10), 0.010 | -5.97% (-55.58%, 20.01%), 0.490 |
| **AUC below 30% the ward baseline*** | | | | |
| Cardiac index | 0.05 (0.01, 0.09), 0.022 | -0.00 (-0.02, 0.01), 0.682 | 0.05 (0.01, 0.10), 0.018 | -5.77% (-93.63%, 49.31%), 0.696 |
| Cardiac output | 0.05 (0.01, 0.09), 0.022 | -0.00 (-0.02, 0.01), 0.702 | 0.05 (0.01, 0.09), 0.034 | -5.34% (-78.57%, 50.50%), 0.704 |
| Mean blood pressure | 0.05 (0.01, 0.09), 0.016 | 0.00 (-0.01, 0.01), 0.838 | 0.05 (0.01, 0.09), 0.014 | 2.06% (-26.78%, 31.72%), 0.830 |
| Systolic blood pressure | 0.05 (0.01, 0.09), 0.014 | 0.00 (-0.01, 0.01), 0.652 | 0.04 (0.01, 0.09), 0.024 | 5.65% (-31.08%, 44.54%), 0.666 |
| Diastolic blood pressure | 0.05 (0.01, 0.09), 0.022 | -0.00 (-0.00, 0.00), 0.994 | 0.05 (0.01, 0.09), 0.022 | -0.10% (-3.70%, 7.45%), 0.984 |
| Left SctO2 | 0.05 (0.01, 0.09), 0.012 | -0.00 (-0.00, 0.00), 0.294 | 0.05 (0.01, 0.09), 0.012 | -0.93% (-8.74%, 0.88%), 0.298 |
| Right SctO2 | 0.05 (0.01, 0.09), 0.024 | 0.00 (-0.00, 0.00), 0.740 | 0.05 (0.01, 0.09), 0.024 | 1.00% (-6.54%, 6.90%), 0.744 |
| SstO2 | 0.05 (0.01, 0.09), 0.028 | 0.00 (-0.01, 0.00), 0.928 | 0.05 (0.01, 0.09), 0.012 | 0.64% (-9.17%, 5.78%), 0.908 |
| Systemic vascular resistance | 0.05 (0.01, 0.09), 0.024 | 0.00 (-0.00, 0.01), 0.962 | 0.05 (0.00, 0.09), 0.034 | 0.23% (-22.00%, 32.59%), 0.966 |
| Heart rate | 0.05 (0.01, 0.08), 0.016 | -0.00 (-0.01, 0.00), 0.844 | 0.05 (0.01, 0.09), 0.016 | -1.09% (-29.94%, 17.00%), 0.848 |
| Stroke volume | 0.05 (0.01, 0.09), 0.014 | -0.00 (-0.01, 0.00), 0.376 | 0.05 (0.01, 0.10), 0.010 | -4.85% (-50.59%, 13.83%), 0.374 |

|  |
| --- |

CI, confidence interval; AUC, area under the curve; SctO2, cerebral tissue oxygen saturation; SstO2, somatic tissue oxygen saturation

* Hemodynamic and oxygenation parameters were quantified using the area under the curve, calculated as the cumulative product of the duration and magnitude of deviation below predefined thresholds—specifically, 10%, 20%, and 30% reductions from ward-based baseline values.

**Supplementary Table 9:** Analysis of the mediation by the AUC below the ward baseline in the association between preoperative cardiac index <3.5 L/min/m² and acute kidney injury

| **Variables** | **Mediation effect (95% CI), P value** | | | |
| --- | --- | --- | --- | --- |
| **Total effect** | **Indirect effect** | **Direct effect** | **Mediation** |
| **AUC below 10% the ward baseline*** | | | | |
| Cardiac index | 0.09 (0.03, 0.15), <0.001 | -0.01 (-0.03, 0.02), 0.620 | 0.10 (0.04, 0.18), <0.001 | -7.02% (-56.08%, 28.82%), 0.620 |
| Cardiac output | 0.09 (0.03, 0.15), 0.004 | -0.01 (-0.03, 0.02), 0.616 | 0.10 (0.03, 0.18), 0.006 | -6.79% (-45.03%, 33.03%), 0.620 |
| Mean blood pressure | 0.09 (0.03, 0.15), <0.001 | 0.00 (-0.01, 0.01), 0.838 | 0.09 (0.03, 0.15), <0.001 | 1.14% (-12.97%, 13.61%), 0.838 |
| Systolic blood pressure | 0.09 (0.03, 0.15), 0.004 | 0.00 (-0.01, 0.01), 0.976 | 0.09 (0.03, 0.16), 0.002 | 0.13% (-24.55%, 19.74%), 0.980 |
| Diastolic blood pressure | 0.09 (0.04, 0.15), <0.001 | -0.00 (-0.00, 0.00), 0.976 | 0.09 (0.04, 0.15), <0.001 | -0.03% (-4.41%, 6.00%), 0.976 |
| Left SctO2 | 0.09 (0.04, 0.15), 0.004 | 0.00 (-0.00, 0.00), 0.582 | 0.09 (0.03, 0.15), 0.002 | 1.50% (-5.20%, 5.05%), 0.578 |
| Right SctO2 | 0.09 (0.03, 0.15), <0.001 | 0.00 (-0.00, 0.00), 0.796 | 0.09 (0.03, 0.15), <0.001 | 0.46% (-2.07%, 2.16%), 0.796 |
| SstO2 | 0.09 (0.04, 0.15), <0.001 | -0.00 (-0.00, 0.00), 0.666 | 0.09 (0.04, 0.15), <0.001 | -0.30% (-4.20%, 1.08%), 0.666 |
| Systemic vascular resistance | 0.09 (0.03, 0.15), <0.001 | -0.00 (-0.01, 0.01), 0.862 | 0.09 (0.03, 0.16), 0.002 | -0.68% (-12.41%, 12.96%), 0.862 |
| Heart rate | 0.09 (0.03, 0.15), 0.002 | -0.00 (-0.01, 0.01), 0.654 | 0.09 (0.04, 0.16), <0.001 | -2.55% (-23.48%, 10.55%), 0.656 |
| Stroke volume | 0.09 (0.03, 0.15), 0.002 | -0.01 (-0.03, 0.01), 0.316 | 0.10 (0.04, 0.18), 0.004 | -7.98% (-48.33%, 8.32%), 0.318 |
| **AUC below 20% the ward baseline*** | | | | |
| Cardiac index | 0.09 (0.03, 0.15), 0.002 | -0.01 (-0.03, 0.02), 0.434 | 0.10 (0.03, 0.18), <0.001 | -10.07% (-67.67%, 19.31%), 0.436 |
| Cardiac output | 0.09 (0.03, 0.15), <0.001 | -0.01 (-0.03, 0.02), 0.488 | 0.10 (0.04, 0.18), <0.001 | -9.51% (-59.80%, 20.02%), 0.488 |
| Mean blood pressure | 0.09 (0.03, 0.15), 0.006 | 0.00 (-0.01, 0.01), 0.922 | 0.09 (0.03, 0.15), 0.004 | 0.38% (-14.33%, 11.70%), 0.920 |
| Systolic blood pressure | 0.09 (0.03, 0.15), 0.004 | 0.00 (-0.01, 0.01), 0.838 | 0.09 (0.03, 0.15), 0.006 | 1.28% (-19.51%, 22.81%), 0.834 |
| Diastolic blood pressure | 0.09 (0.03, 0.15), <0.001 | -0.00 (-0.00, 0.00), >0.999 | 0.09 (0.03, 0.15), 0.002 | -0.04% (-3.40%, 5.11%), >0.999 |
| Left SctO2 | 0.09 (0.03, 0.16), 0.004 | -0.00 (-0.00, 0.00), 0.652 | 0.09 (0.03, 0.16), 0.004 | -0.13% (-2.70%, 1.27%), 0.648 |
| Right SctO2 | 0.09 (0.03, 0.15), 0.004 | -0.00 (-0.00, 0.00), 0.688 | 0.09 (0.04, 0.15), 0.004 | -0.25% (-1.92%, 1.80%), 0.692 |
| Forearm SstO2 | 0.09 (0.03, 0.16), <0.001 | -0.00 (-0.00, 0.00), 0.522 | 0.09 (0.03, 0.16), <0.001 | -0.56% (-2.64%, 2.73%), 0.522 |
| Systemic vascular resistance | 0.09 (0.03, 0.15), 0.002 | -0.00 (-0.01, 0.01), 0.970 | 0.09 (0.03, 0.15), 0.002 | -0.21% (-10.80%, 12.85%), 0.972 |
| Heart rate | 0.09 (0.03, 0.15), 0.002 | -0.00 (-0.01, 0.01), 0.734 | 0.09 (0.03, 0.15), 0.004 | -1.69% (-22.85%, 12.35%), 0.736 |
| Stroke volume | 0.09 (0.03, 0.15), <0.001 | -0.01 (-0.03, 0.01), 0.270 | 0.10 (0.04, 0.17), 0.002 | -7.91% (-42.01%, 7.88%), 0.270 |
| **AUC below 30% the ward baseline*** | | | | |
| Cardiac index | 0.09 (0.03, 0.14), 0.004 | -0.01 (-0.04, 0.01), 0.220 | 0.11 (0.04, 0.19), 0.002 | -13.72% (-90.35%, 7.96%), 0.224 |
| Cardiac output | 0.09 (0.02, 0.14), 0.002 | -0.01 (-0.03, 0.01), 0.276 | 0.11 (0.04, 0.18), 0.002 | -12.84% (-67.47%, 11.61%), 0.278 |
| Mean blood pressure | 0.09 (0.03, 0.15), <0.001 | 0.00 (-0.01, 0.01), 0.830 | 0.09 (0.03, 0.15), <0.001 | 0.82% (-9.84%, 11.79%), 0.830 |
| Systolic blood pressure | 0.09 (0.04, 0.15), 0.002 | 0.00 (-0.01, 0.01), 0.712 | 0.09 (0.03, 0.15), 0.002 | 2.61% (-13.96%, 18.81%), 0.714 |
| Diastolic blood pressure | 0.09 (0.03, 0.15), 0.002 | -0.00 (-0.00, 0.00), 0.908 | 0.09 (0.03, 0.15), 0.002 | -0.04% (-2.06%, 4.48%), 0.906 |
| Left SctO2 | 0.09 (0.04, 0.15), 0.004 | -0.00 (-0.00, 0.00), 0.212 | 0.09 (0.04, 0.15), 0.004 | -0.68% (-3.31%, 0.47%), 0.212 |
| Right SctO2 | 0.09 (0.04, 0.15), 0.002 | -0.00 (-0.00, 0.00), 0.334 | 0.09 (0.04, 0.16), 0.002 | -0.63% (-3.58%, 0.92%), 0.336 |
| SstO2 | 0.09 (0.03, 0.15), 0.002 | -0.00 (-0.00, 0.00), 0.616 | 0.09 (0.03, 0.15), 0.002 | -0.46% (-2.40%, 5.08%), 0.618 |
| Systemic vascular resistance | 0.09 (0.03, 0.15), 0.010 | 0.00 (-0.00, 0.01), 0.922 | 0.09 (0.03, 0.15), 0.008 | 0.27% (-6.26%, 10.87%), 0.924 |
| Heart rate | 0.09 (0.03, 0.15), 0.002 | -0.00 (-0.01, 0.01), 0.728 | 0.09 (0.03, 0.16), <0.001 | -1.46% (-20.45%, 7.61%), 0.730 |
| Stroke volume | 0.09 (0.03, 0.15), 0.002 | -0.01 (-0.02, 0.00), 0.230 | 0.10 (0.04, 0.17), <0.001 | -6.46% (-38.31%, 5.64%), 0.232 |

|  |
| --- |

CI, confidence interval; AUC, area under the curve; SctO2, cerebral tissue oxygen saturation; SstO2, somatic tissue oxygen saturation

* Hemodynamic and oxygenation parameters were quantified using the area under the curve, calculated as the cumulative product of the duration and magnitude of deviation below predefined thresholds—specifically, 10%, 20%, and 30% reductions from ward-based baseline values.

**Supplementary Table 10:** Analysis of the mediation of intraoperative-related variables in the association between preoperative cardiac index <3.0 L/min/m² and acute kidney injury

|  | **Mediation effect (95% CI), P value** | | | |
| --- | --- | --- | --- | --- |
| **Total effect** | **Indirect effect** | **Direct effect** | **Mediation** |
| **Use of intraoperative vasoactive drugs** | | | | |
| Nicardipine | 0.05 (0.01, 0.08), 0.010 | -0.00 (-0.00, 0.00), 0.870 | 0.05 (0.01, 0.08), 0.010 | -0.18% (-4.13%, 2.59%), 0.868 |
| Noradrenaline | 0.05 (0.01, 0.08), 0.020 | -0.00 (-0.00, 0.00), 0.728 | 0.05 (0.01, 0.08), 0.018 | -0.73% (-10.29%, 7.54%), 0.744 |
| Esmolol | 0.05 (0.01, 0.08), 0.010 | 0.00 (-0.00, 0.00), 0.194 | 0.04 (0.01, 0.08), 0.012 | 2.34% (-1.22%, 16.08%), 0.200 |
| **Intraoperative volume balance** | | | | |
| Intra fluid given | 0.05 (0.01, 0.08), 0.020 | -0.00 (-0.00, 0.00), 0.874 | 0.05 (0.01, 0.08), 0.018 | -0.16% (-3.26%, 2.57%), 0.882 |
| Estimated blood loss | 0.05 (0.01, 0.08), 0.020 | -0.00 (-0.00, 0.00), 0.064 | 0.05 (0.01, 0.09), 0.014 | -4.08% (-22.30%, 0.78%), 0.084 |
| **Intraoperative lowest cardiac index vs. baseline level** | | | | |
| Percentage change* | 0.05 (0.01, 0.09), 0.016 | -0.00 (-0.01, 0.01), 0.814 | 0.05 (0.01, 0.09), 0.016 | -2.94% (-53.54%, 41.34%), 0.822 |
| Absolute change† | 0.05 (0.01, 0.09), 0.018 | 0.00 (-0.02, 0.03), 0.834 | 0.04 (-0.01, 0.09), 0.106 | 7.47% (-113.04%, 140.79%), 0.848 |

CI, confidence interval

* The intraoperative cardiac index percentage change is calculated as (baseline value minus intraoperative minimum value) divided by the baseline value, then multiplied by 100%, representing the extent of cardiac index fluctuation during surgery.

† The intraoperative cardiac index absolute change is calculated as the baseline value minus the intraoperative minimum value, representing the fluctuation of the cardiac index during surgery.

**Supplementary Table 11:** Distribution of 748 cardiac procedures identified in the MIMIC-IV v3.1 database

| **Type of procedure** | **Number of patients, n (%)** | **ICD code** |
| --- | --- | --- |
| Insertion of Infusion Device into Superior Vena Cava, Percutaneous Approach | 376 (50.3) | 02HV33Z |
| Insertion of Infusion Device into Right Atrium, Percutaneous Approach | 62 (8.3) | 02H633Z |
| Insertion of Pacemaker Lead into Right Atrium, Percutaneous Approach | 24 (3.2) | 02H63JZ |
| Initial insertion of transvenous leads [electrodes] into atrium and ventricle | 18 (2.4) | 3772 |
| Removal of Short-term External Heart Assist System from Heart, Percutaneous Approach | 16 (2.1) | 02PA3RZ |
| Insertion of Monitoring Device into Pulmonary Trunk, Percutaneous Approach | 14 (1.9) | 02HP32Z |
| Insertion of Pacemaker Lead into Right Ventricle, Percutaneous Approach | 14 (1.9) | 02HK3JZ |
| Insertion of temporary transvenous pacemaker system | 13 (1.7) | 3778 |
| Insertion of Short-term External Heart Assist System into Heart, Percutaneous Approach | 10 (1.3) | 02HA3RZ |
| Insertion of Monitoring Device into Right Pulmonary Artery, Percutaneous Approach | 10 (1.3) | 02HQ32Z |
| Implant of pulsation balloon | 8 (1.1) | 3761 |
| Pericardiotomy | 8 (1.1) | 3712 |
| Implantation or replacement of automatic cardioverter/defibrillator, total system [AICD] | 8 (1.1) | 3794 |
| Right heart cardiac catheterization | 7 (0.9) | 3721 |
| Open chest cardiac massage | 6 (0.8) | 3791 |
| Initial insertion of dual-chamber device | 6 (0.8) | 3783 |
| Removal of Infusion Device from Great Vessel, External Approach | 6 (0.8) | 02PYX3Z |
| Bypass Coronary Artery, One Artery from Left Internal Mammary, Open Approach | 6 (0.8) | 02100Z9 |
| Percutaneous balloon valvuloplasty | 5 (0.7) | 3596 |
| Replacement of Aortic Valve with Zooplastic Tissue, Open Approach | 5 (0.7) | 02RF08Z |
| Insertion of Defibrillator Lead into Right Atrium, Percutaneous Approach | 5 (0.7) | 02H63KZ |
| Insertion of Implantable Heart Assist System into Heart, Open Approach | 5 (0.7) | 02HA0QZ |
| Insertion of percutaneous external heart assist device | 4 (0.5) | 3768 |
| Left heart cardiac catheterization | 4 (0.5) | 3722 |
| Pericardiocentesis | 4 (0.5) | 370 |
| Open and other replacement of aortic valve with tissue graft | 4 (0.5) | 3521 |
| Open heart valvuloplasty of mitral valve without replacement | 3 (0.4) | 3512 |
| Insertion of Short-term External Heart Assist System into Heart, Open Approach | 3 (0.4) | 02HA0RZ |
| Removal of Infusion Device from Great Vessel, Percutaneous Approach | 3 (0.4) | 02PY33Z |
| Supplement Mitral Valve with Synthetic Substitute, Open Approach | 3 (0.4) | 02UG0JZ |
| Other operations on vessels of heart | 3 (0.4) | 3699 |
| Insertion of drug-eluting coronary artery stent(s) | 3 (0.4) | 3607 |
| Insertion of Defibrillator Lead into Right Ventricle, Percutaneous Approach | 3 (0.4) | 02HK3KZ |
| (Aorto)coronary bypass of two coronary arteries | 3 (0.4) | 3612 |
| Dilation of Coronary Artery, One Artery with Drug-eluting Intraluminal Device | 3 (0.4) | 027034Z |
| Removal of Short-term External Heart Assist System from Heart, Open Approach | 3 (0.4) | 02PA0RZ |
| Removal of Cardiac Lead from Heart, Percutaneous Approach | 3 (0.4) | 02PA3MZ |
| Extirpation of Matter from Pericardium, Open Approach | 3 (0.4) | 02CN0ZZ |
| Removal of external heart assist system(s) or device(s) | 2 (0.3) | 3764 |
| Other repair of heart and pericardium | 2 (0.3) | 3749 |
| Open and other replacement of mitral valve | 2 (0.3) | 3524 |
| (Aorto)coronary bypass of one coronary artery | 2 (0.3) | 3611 |
| Replacement of Mitral Valve with Zooplastic Tissue, Open Approach | 2 (0.3) | 02RG08Z |
| Replacement of Mitral Valve with Synthetic Substitute, Open Approach | 2 (0.3) | 02RG0JZ |
| Dilation of Aortic Valve, Percutaneous Approach | 2 (0.3) | 027F3ZZ |
| Initial insertion of transvenous lead [electrode] into ventricle | 2 (0.3) | 3771 |
| Replacement of transvenous atrial and/or ventricular lead(s) [electrode] | 2 (0.3) | 3776 |
| Destruction of Conduction Mechanism, Percutaneous Approach | 2 (0.3) | 02583ZZ |
| Repair Left Pulmonary Vein, Open Approach | 1 (0.1) | 02QT0ZZ |
| Single internal mammary-coronary artery bypass | 1 (0.1) | 3615 |
| Removal of Intraluminal Device from Great Vessel, External Approach | 1 (0.1) | 02PYXDZ |
| Replacement of Thoracic Aorta, Ascending/Arch with Synthetic Substitute, Open Approach | 1 (0.1) | 02RX0JZ |
| Supplement Mitral Valve with Synthetic Substitute, Percutaneous Approach | 1 (0.1) | 02UG3JZ |
| Replacement of Mitral Valve with Nonautologous Tissue Substitute, Open Approach | 1 (0.1) | 02RG0KZ |
| Revision of Infusion Device in Great Vessel, External Approach | 1 (0.1) | 02WYX3Z |
| Replacement of Aortic Valve with Zooplastic Tissue, Percutaneous Approach | 1 (0.1) | 02RF38Z |
| Revision of Short-term External Heart Assist System in Heart, Percutaneous Approach | 1 (0.1) | 02WA3RZ |
| Replacement of Aortic Valve with Synthetic Substitute, Open Approach | 1 (0.1) | 02RF0JZ |
| Repair Thoracic Aorta, Ascending/Arch, Open Approach | 1 (0.1) | 02QX0ZZ |
| Repair Aortic Valve, Open Approach | 1 (0.1) | 02QF0ZZ |
| Revision of lead [electrode] | 1 (0.1) | 3775 |
| Repair Heart, Open Approach | 1 (0.1) | 02QA0ZZ |
| Repair Mitral Valve, Open Approach | 1 (0.1) | 02QG0ZZ |
| Supplement Atrial Septum with Synthetic Substitute, Percutaneous Approach | 1 (0.1) | 02U53JZ |
| (Aorto)coronary bypass of four or more coronary arteries | 1 (0.1) | 3614 |
| Insertion or replacement of epicardial lead [electrode] into epicardium | 1 (0.1) | 3774 |
| Removal of Implantable Heart Assist System from Heart, Open Approach | 1 (0.1) | 02PA0QZ |
| Release Papillary Muscle, Open Approach | 1 (0.1) | 02ND0ZZ |
| (Aorto)coronary bypass of three coronary arteries | 1 (0.1) | 3613 |
| Annuloplasty | 1 (0.1) | 3533 |
| Bypass Coronary Artery, One Artery from Left Internal Mammary with Autologous Arterial Tissue | 1 (0.1) | 02100A9 |
| Bypass Coronary Artery, Two Arteries from Aorta with Autologous Arterial Tissue, Open Approach | 1 (0.1) | 02110AW |
| Bypass Coronary Artery, Two Arteries from Aorta with Autologous Venous Tissue, Open Approach | 1 (0.1) | 021109W |
| Bypass Coronary Artery, Two Arteries from Left Internal Mammary, Open Approach | 1 (0.1) | 02110Z9 |
| Catheter based invasive electrophysiologic testing | 1 (0.1) | 3726 |
| Combined right and left heart cardiac catheterization | 1 (0.1) | 3723 |
| Destruction of Left Ventricle, Open Approach | 1 (0.1) | 025L0ZZ |
| Dilation of Coronary Artery, One Artery with Two Drug-eluting Intraluminal Devices | 1 (0.1) | 027035Z |
| Excision or destruction of other lesion or tissue of heart, endovascular approach | 1 (0.1) | 3734 |
| Implantation of automatic cardioverter/defibrillator lead(s) only | 1 (0.1) | 3795 |
| Insertion of Defibrillator Lead into Left Ventricle, Percutaneous Approach | 1 (0.1) | 02HL3KZ |
| Insertion of Intracardiac Pacemaker into Right Ventricle, Percutaneous Approach | 1 (0.1) | 02HK3NZ |
| Insertion of Pacemaker Lead into Coronary Vein, Percutaneous Approach | 1 (0.1) | 02H43JZ |
| Insertion of Pacemaker Lead into Left Ventricle, Percutaneous Approach | 1 (0.1) | 02HL3JZ |
| Insertion of Pacemaker Lead into Pericardium, Percutaneous Approach | 1 (0.1) | 02HN3JZ |
| Insertion of Pacemaker Lead into Right Ventricle, Open Approach | 1 (0.1) | 02HK0JZ |
| Insertion of non-drug-eluting coronary artery stent(s) | 1 (0.1) | 3606 |
| Inspection of Heart, Open Approach | 1 (0.1) | 02JA0ZZ |
| Open and other replacement of aortic valve | 1 (0.1) | 3522 |
| Open and other replacement of mitral valve with tissue graft | 1 (0.1) | 3523 |
| Pericardiectomy | 1 (0.1) | 3731 |
| Supplement Pericardium with Zooplastic Tissue, Open Approach | 1 (0.1) | 02UN08Z |

**Supplementary Table 12:** Methods of pre-procedure cardiac output measurement in 748 cardiac cases from the MIMIC-IV v3.1 database

| **Methods of cardiac output measurement** | **Number of patients, n (%)** |
| --- | --- |
| **Thermodilution using pulmonary artery catheter** | 592 (79.1) |
| **Non-invasive bioreactance-based technology** | 136 (18.2) |
| **Arterial pressure waveform analysis** | 11 (1.5) |
| **Pulse contour analysis with transpulmonary thermodilution** | 9 (1.2) |

**Supplementary Table 13:** Association between preoperative cardiac index and acute kidney injury through crude analysis in the MIMIC-IV v3.1 database

| **Methods of analysis** | **AKI, low CI vs. high CI, n (%)** | **Odds ratio (95% CI)** | **P value** |
| --- | --- | --- | --- |
| Crude analysis (n, 582 vs. 166)* | 109 (18.8) vs. 46 (27.7) | 1.66 (1.11 to 2.47) | 0.012 |

CI, confidence interval

* Univariate logistic regression results (unadjusted for demographic or preoperative characteristics in Table 14)

**Supplementary Table 14:** Baseline information of patients having cardiac procedures in the MIMIC-IV v3.1 database

| **Characteristics*** | **Data availability** | **Summery (n = 748)** |
| --- | --- | --- |
| Age (year), mean (SD) | Available | 67 (14) |
| Male, n (%) | Available | 318 (42.5) |
| Height (cm), mean (SD) | Available | 169 (10) |
| Body mass index (kg/m2), mean (SD) | Available | 29.6 (6.8) |
| Smoking, n (%)† | N/A | N/A |
| Drinking, n (%)‡ | N/A | N/A |
| Myocardial infarction, n (%)§ | Available | 227 (30.3) |
| Arrhythmia, n (%)¶ | N/A | N/A |
| Diabetes, n (%)# | Available | 284 (38.0) |
| Hypertension, n (%)** | Available | 552 (73.8) |
| Carotid artery disease, n (%)†† | N/A | N/A |
| Age-adjusted CCI, median (IQR ) ‡‡ | Available | 5 (4 – 7) |
| Beta blocker, n (%) | N/A | N/A |
| ACEI, n (%) | N/A | N/A |
| Calcium channel blocker, n (%) | N/A | N/A |
| Angiotensin receptor blocker, n (%) | N/A | N/A |
| Antidiabetic, n (%)§§ | N/A | N/A |
| Diuretic, n (%) | N/A | N/A |
| MAP (mmHg), mean (SD)¶¶ | Available | 74 (12) |
| C-reactive protein (mg/L), median (IQR)## | N/A | N/A |
| eGFR (mL/min/1.73 m2), median (IQR)*** | Available | 58 (32 – 86) |
| Guided care group, n (%)††† | N/A | N/A |

SD, standard deviation; N/A, not available; CCI, Charlson comorbidity index; IQR, interquartile range; ACEI, angiotensin-converting enzyme inhibitors; MAP, mean arterial pressure; eGFR, estimated glomerular filtration rate

* Summary statistics are reported as n (%) for categorical variables and as mean (SD) or median (IQR) for continuous variables.

† Smoking was defined as a self-reported history of tobacco use, as obtained during the preoperative interview.

‡ Drinking was defined as a self-reported history of alcohol consumption, excluding occasional or purely social drinking, as obtained during the preoperative interview.

§ Myocardial infarction was defined as a prior event confirmed by clinical presentation, electrocardiographic changes, elevated cardiac biomarkers, or imaging evidence of myocardial infarction.

¶ Arrhythmia was defined as an abnormal cardiac electrical rhythm that was symptomatic, required treatment, or prompted further diagnostic evaluation.

# Diabetes was defined as a documented clinical diagnosis established according to standard care practices.

** Hypertension was defined as a documented clinical diagnosis or recorded use of antihypertensive medication, in accordance with standard medical practice.

†† Carotid artery disease was defined as ≥50% stenosis in at least one carotid artery, as identified by preoperative carotid ultrasound screening.

‡‡ The age-adjusted CCI quantifies comorbid conditions based on their number and severity, with additional points assigned for increasing age. The original CCI includes 17 weighted comorbidities, while the age-adjusted version incorporates age to improve risk stratification and predictive accuracy for clinical outcomes.1

§§ Antidiabetic agents were defined as any pharmacologic treatments used for the management of established diabetes, including both orally administered medications and the use of insulin.

¶¶ MAP was measured 24 to 48 hours before surgery with patients resting in a supine position, eyes closed, and breathing room air in a quiet ward environment.

## C-reactive protein values were missing for 271 patients (13.9%). Multiple imputations by chained equations (50 imputations) were performed using the R package ‘mice’ with the Predictive Mean Matching method. The imputed datasets were combined using Rubin’s rules.

*** eGFR was calculated using the 2021 Chronic Kidney Disease Epidemiology Collaboration (CKD-EPI) equation.2

††† Each patient was randomly assigned to either the guided care group or the usual care group as part of the Bottomline-CS randomised controlled trial, which was designed to evaluate the effectiveness of guided care interventions.3

**Supplementary Table 15:** Demographic and preoperative characteristics with patients grouped by cardiac index <3.0 L/min/m2 vs. ≥3.0 L/min/m2 in the MIMIC-IV v3.1 database

| **Characteristics*** | **Cardiac index <3.0 L/min/m2**  **(n = 582)** | **Cardiac index ≥3.0 L/min/m2**  **(n = 166)** | **Absolute**  **Standardized**  **Difference** |
| --- | --- | --- | --- |
| Age (year), mean (SD) | 69 (13) | 60 (16) | 0.695 |
| Male, n (%) | 261 (44.8) | 57 (34.3) | 0.216 |
| Height (cm), mean (SD) | 169 (10) | 171 (9) | 0.225 |
| Body mass index (kg/m2), mean (SD) | 29.4 (6.5) | 30.3 (8.0) | 0.118 |
| Myocardial infarction, n (%)† | 195 (33.5) | 32 (19.3) | 0.327 |
| Diabetes, n (%)‡ | 234 (40.2) | 50 (30.1) | 0.212 |
| Hypertension, n (%)§ | 457 (78.5) | 95 (57.2) | 0.468 |
| Age adjusted CCI, median (IQR)¶ | 6 (4 – 7) | 5 (3 – 7) | 0.339 |
| MAP (mmHg), mean (SD)# | 74 (11) | 76 (14) | 0.187 |
| eGFR (mL/min/1.73m2), median (IQR)** | 59 (32 – 86) | 58 (28 – 89) | 0.029 |

SD, standard deviation; CCI, Charlson comorbidity index; IQR, interquartile range; MAP, mean arterial pressure; eGFR, estimated glomerular filtration rate

* Summary statistics are reported as n (%) for categorical variables and as mean (SD) or median (IQR) for continuous variables.

† Myocardial infarction was defined as a prior event confirmed by clinical presentation, electrocardiographic changes, elevated cardiac biomarkers, or imaging evidence of myocardial infarction.

‡ Diabetes was defined as a documented clinical diagnosis established according to standard care practices.

§ Hypertension was defined as a documented clinical diagnosis or recorded use of antihypertensive medication, in accordance with standard medical practice.

¶ The age-adjusted CCI quantifies comorbid conditions based on their number and severity, with additional points assigned for increasing age. The original CCI includes 17 weighted comorbidities, while the age-adjusted version incorporates age to improve risk stratification and predictive accuracy for clinical outcomes.1

# MAP was measured 24 to 48 hours before surgery with patients resting in a supine position, eyes closed, and breathing room air in a quiet ward environment.

** eGFR was calculated using the 2021 Chronic Kidney Disease Epidemiology Collaboration (CKD-EPI) equation.2

**Supplementary Figure 1:** Comparison of a single patient's raw and smoothed intraoperative cardiac index.

This figure illustrates the intraoperative cardiac index trend for a single patient. The blue line represents raw cardiac index values recorded continuously during surgery. The orange line shows the smoothed curve, generated using a moving time window in which the median cardiac index was calculated every 10 seconds. This smoothing method reduces short-term fluctuations and highlights the underlying physiological trend. The x-axis denotes intraoperative time in minutes, and the y-axis represents cardiac index (L/min/m²).

**
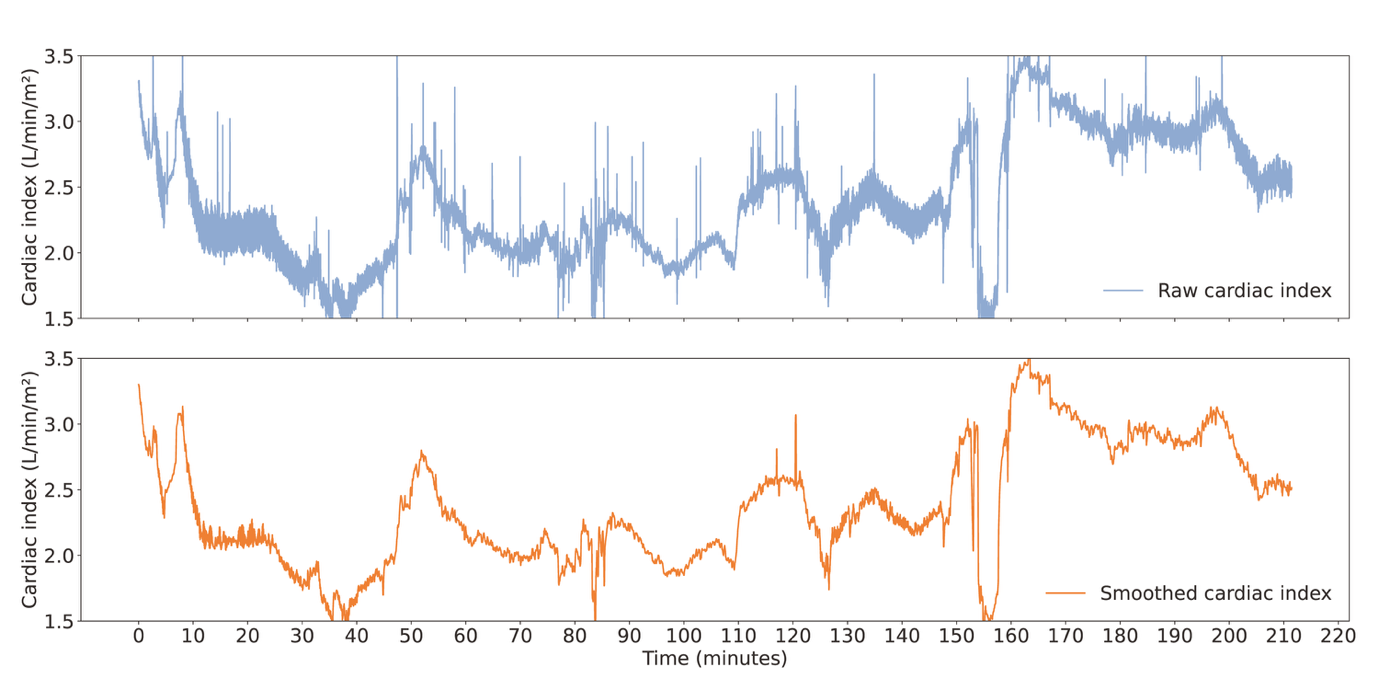
**

**References**

1. Koppie TM, Serio AM, Vickers AJ, et al. Age-adjusted Charlson comorbidity score is associated with treatment decisions and clinical outcomes for patients undergoing radical cystectomy for bladder cancer. *Cancer*. Jun 2008;112(11):2384-92. doi:10.1002/cncr.23462

2. Inker LA, Eneanya ND, Coresh J, et al. New Creatinine- and Cystatin C-Based Equations to Estimate GFR without Race. *N Engl J Med*. Nov 4 2021;385(19):1737-1749. doi:10.1056/NEJMoa2102953

3. Han J, Zhai W, Wu Z, et al. Care guided by tissue oxygenation and haemodynamic monitoring in off-pump coronary artery bypass grafting (Bottomline-CS): assessor blind, single centre, randomised controlled trial. *Bmj*. Mar 24 2025;388:e082104. doi:10.1136/bmj-2024-082104
